# Supplementary material for: Bias-targeted deep learning enhances short-range heavy rainfall forecasts
Source: Research Square preprint supplement (doi:10.21203/rs.3.rs-8314049/v1), 2025-12-17
Supplement: Supplementary file 1 [file 52af87c642c3ffb1af911a3f.docx]

**Bias-targeted deep learning enhances short-range heavy rainfall forecasts**

Supplementary Information

Tao Tang1#, Wenqiang Shen1#, Jiaolan Fu2, Ping He3, Hao Qian1* and Ling Luo1*

1 Zhejiang Meteorological Observatory, Hangzhou 310002, China

2 National Meteorological Center, Beijing 100081, China

3 School of Earth Science, Zhejiang University, Hangzhou 310058, China

#These authors contributed equally to this work.

*Corresponding to [yoru.007@163.com](mailto:yoru.007@163.com); [luoling040806@163.com](mailto:luoling040806@163.com)

Including:

Supplementary Figure 1.

Supplementary Figure 2.

Supplementary Figure 3.

Supplementary Figure 4.

Supplementary Figure 5.

Supplementary Table 1.

Supplementary Table 2.

Supplementary Table 3.

Supplementary Table 4.

Supplementary Table 5.


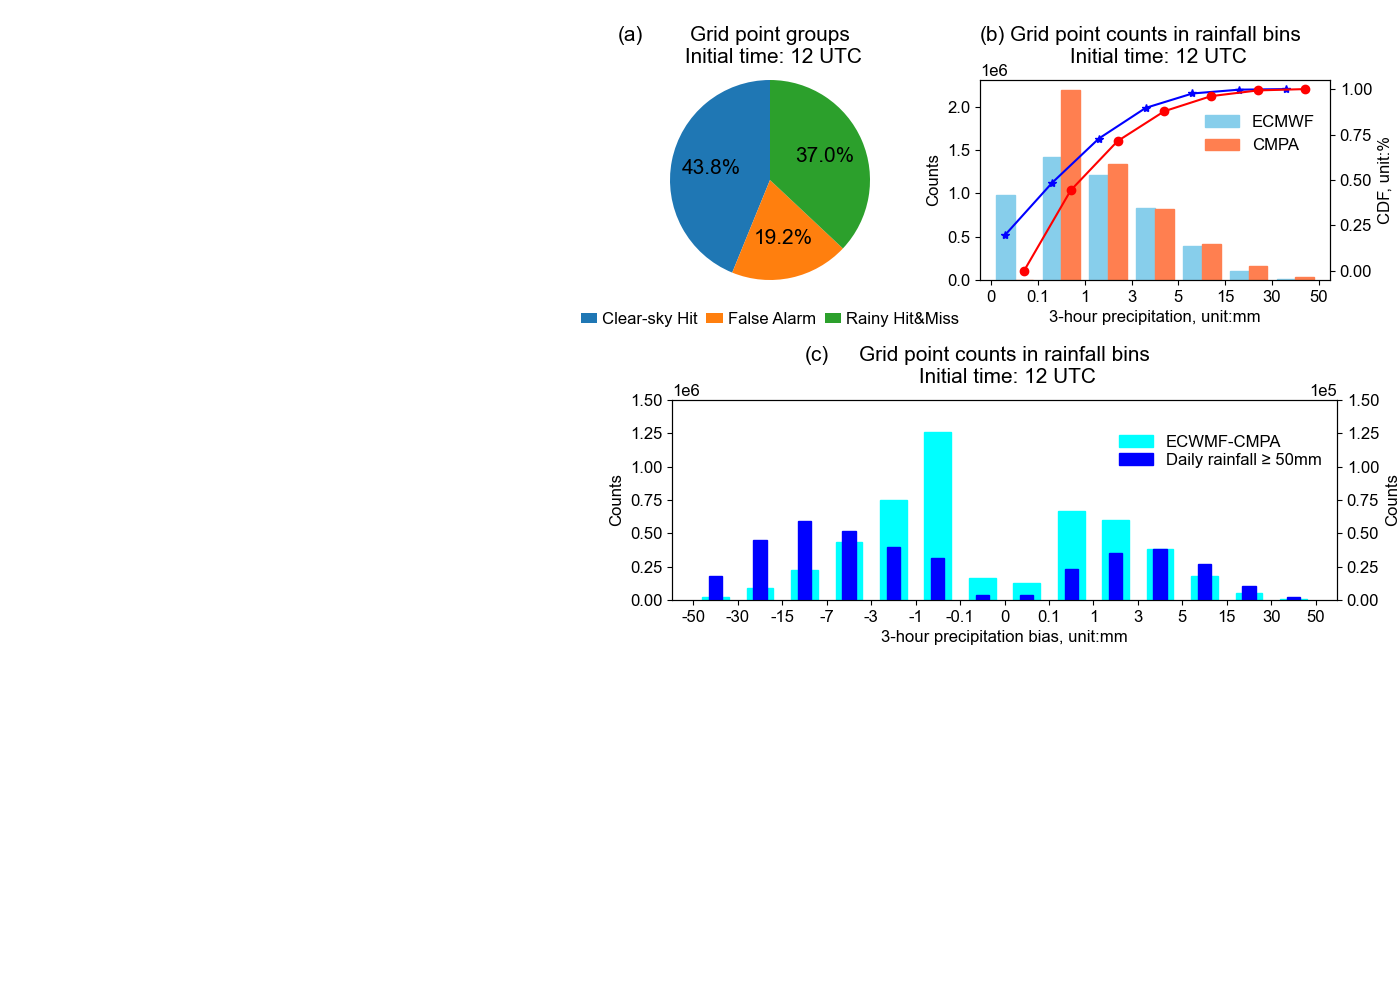


**Supplementary Figure 1. Biases in ECMWF precipitation forecasts over the Yangtze River Delta (YRD).** (a)-(c) Same as (b)-(d) in Figure 1, but for the results based on the ECMWF forecasts initialized at 12 UTC.


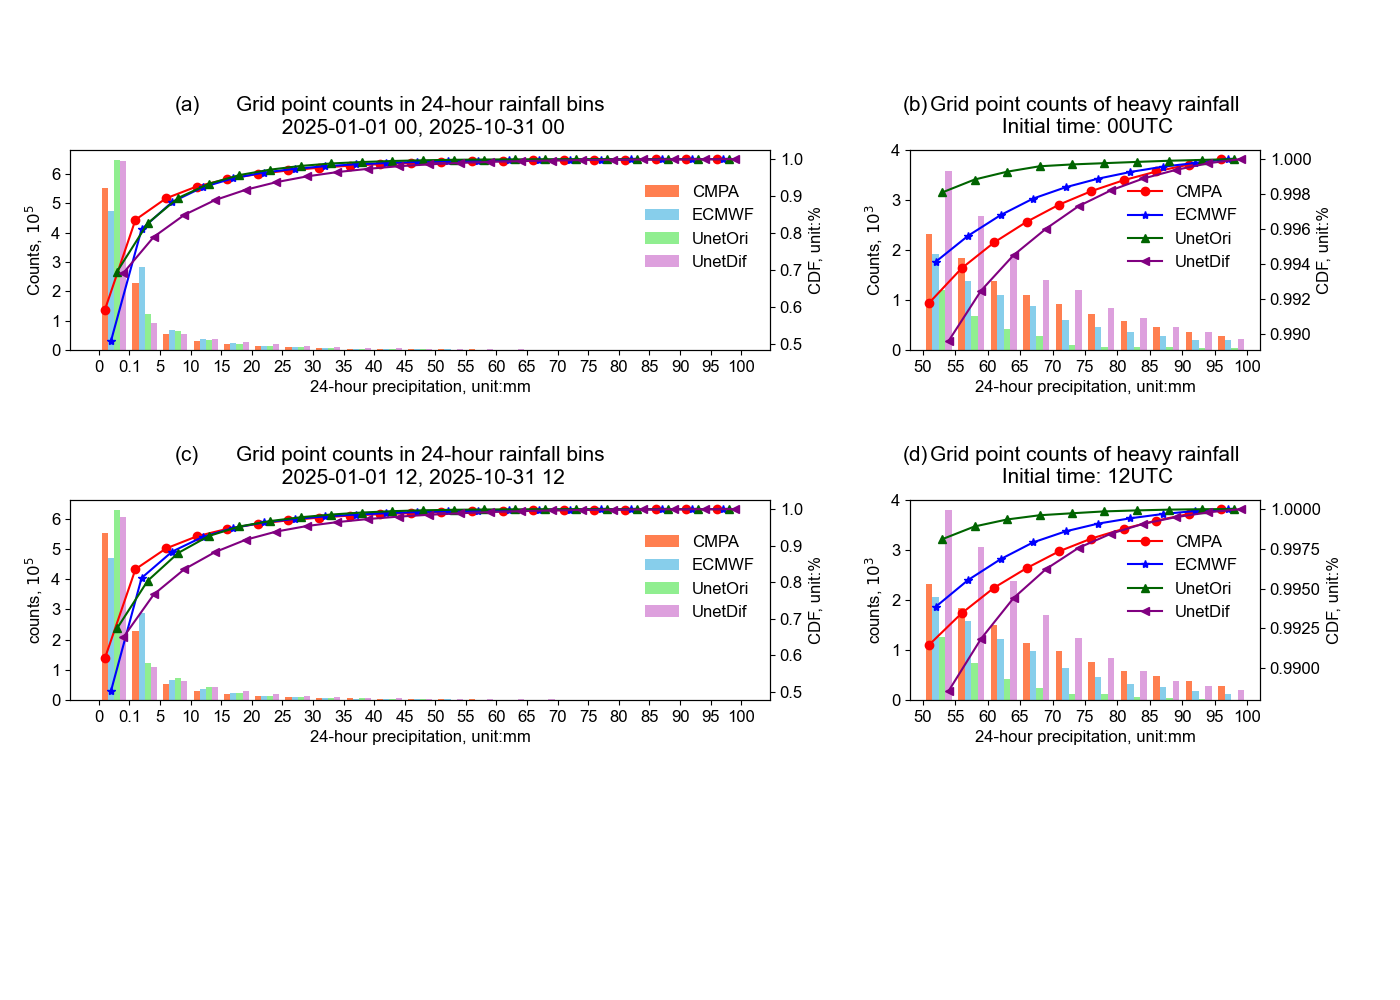


**Supplementary Figure 2. Number of grid points and cumulative distribution functions in each precipitation intensity bin over the YRD region.** (a) Daily precipitation forecasts initialized at 00 UTC with a 36-hour lead time. The number of grid points and the cumulative distribution function in each bin are represented by bar and marker, respectively. CMPA, ECMWF, UnetOri, and UnetDif are represented by orange, blue, green, and purple, respectively.

(b) Same as (a), but for the details of precipitation range from 50 to100 mm per day. (c), (d), Same as (a), (b), but for results initialized at 12 UTC.


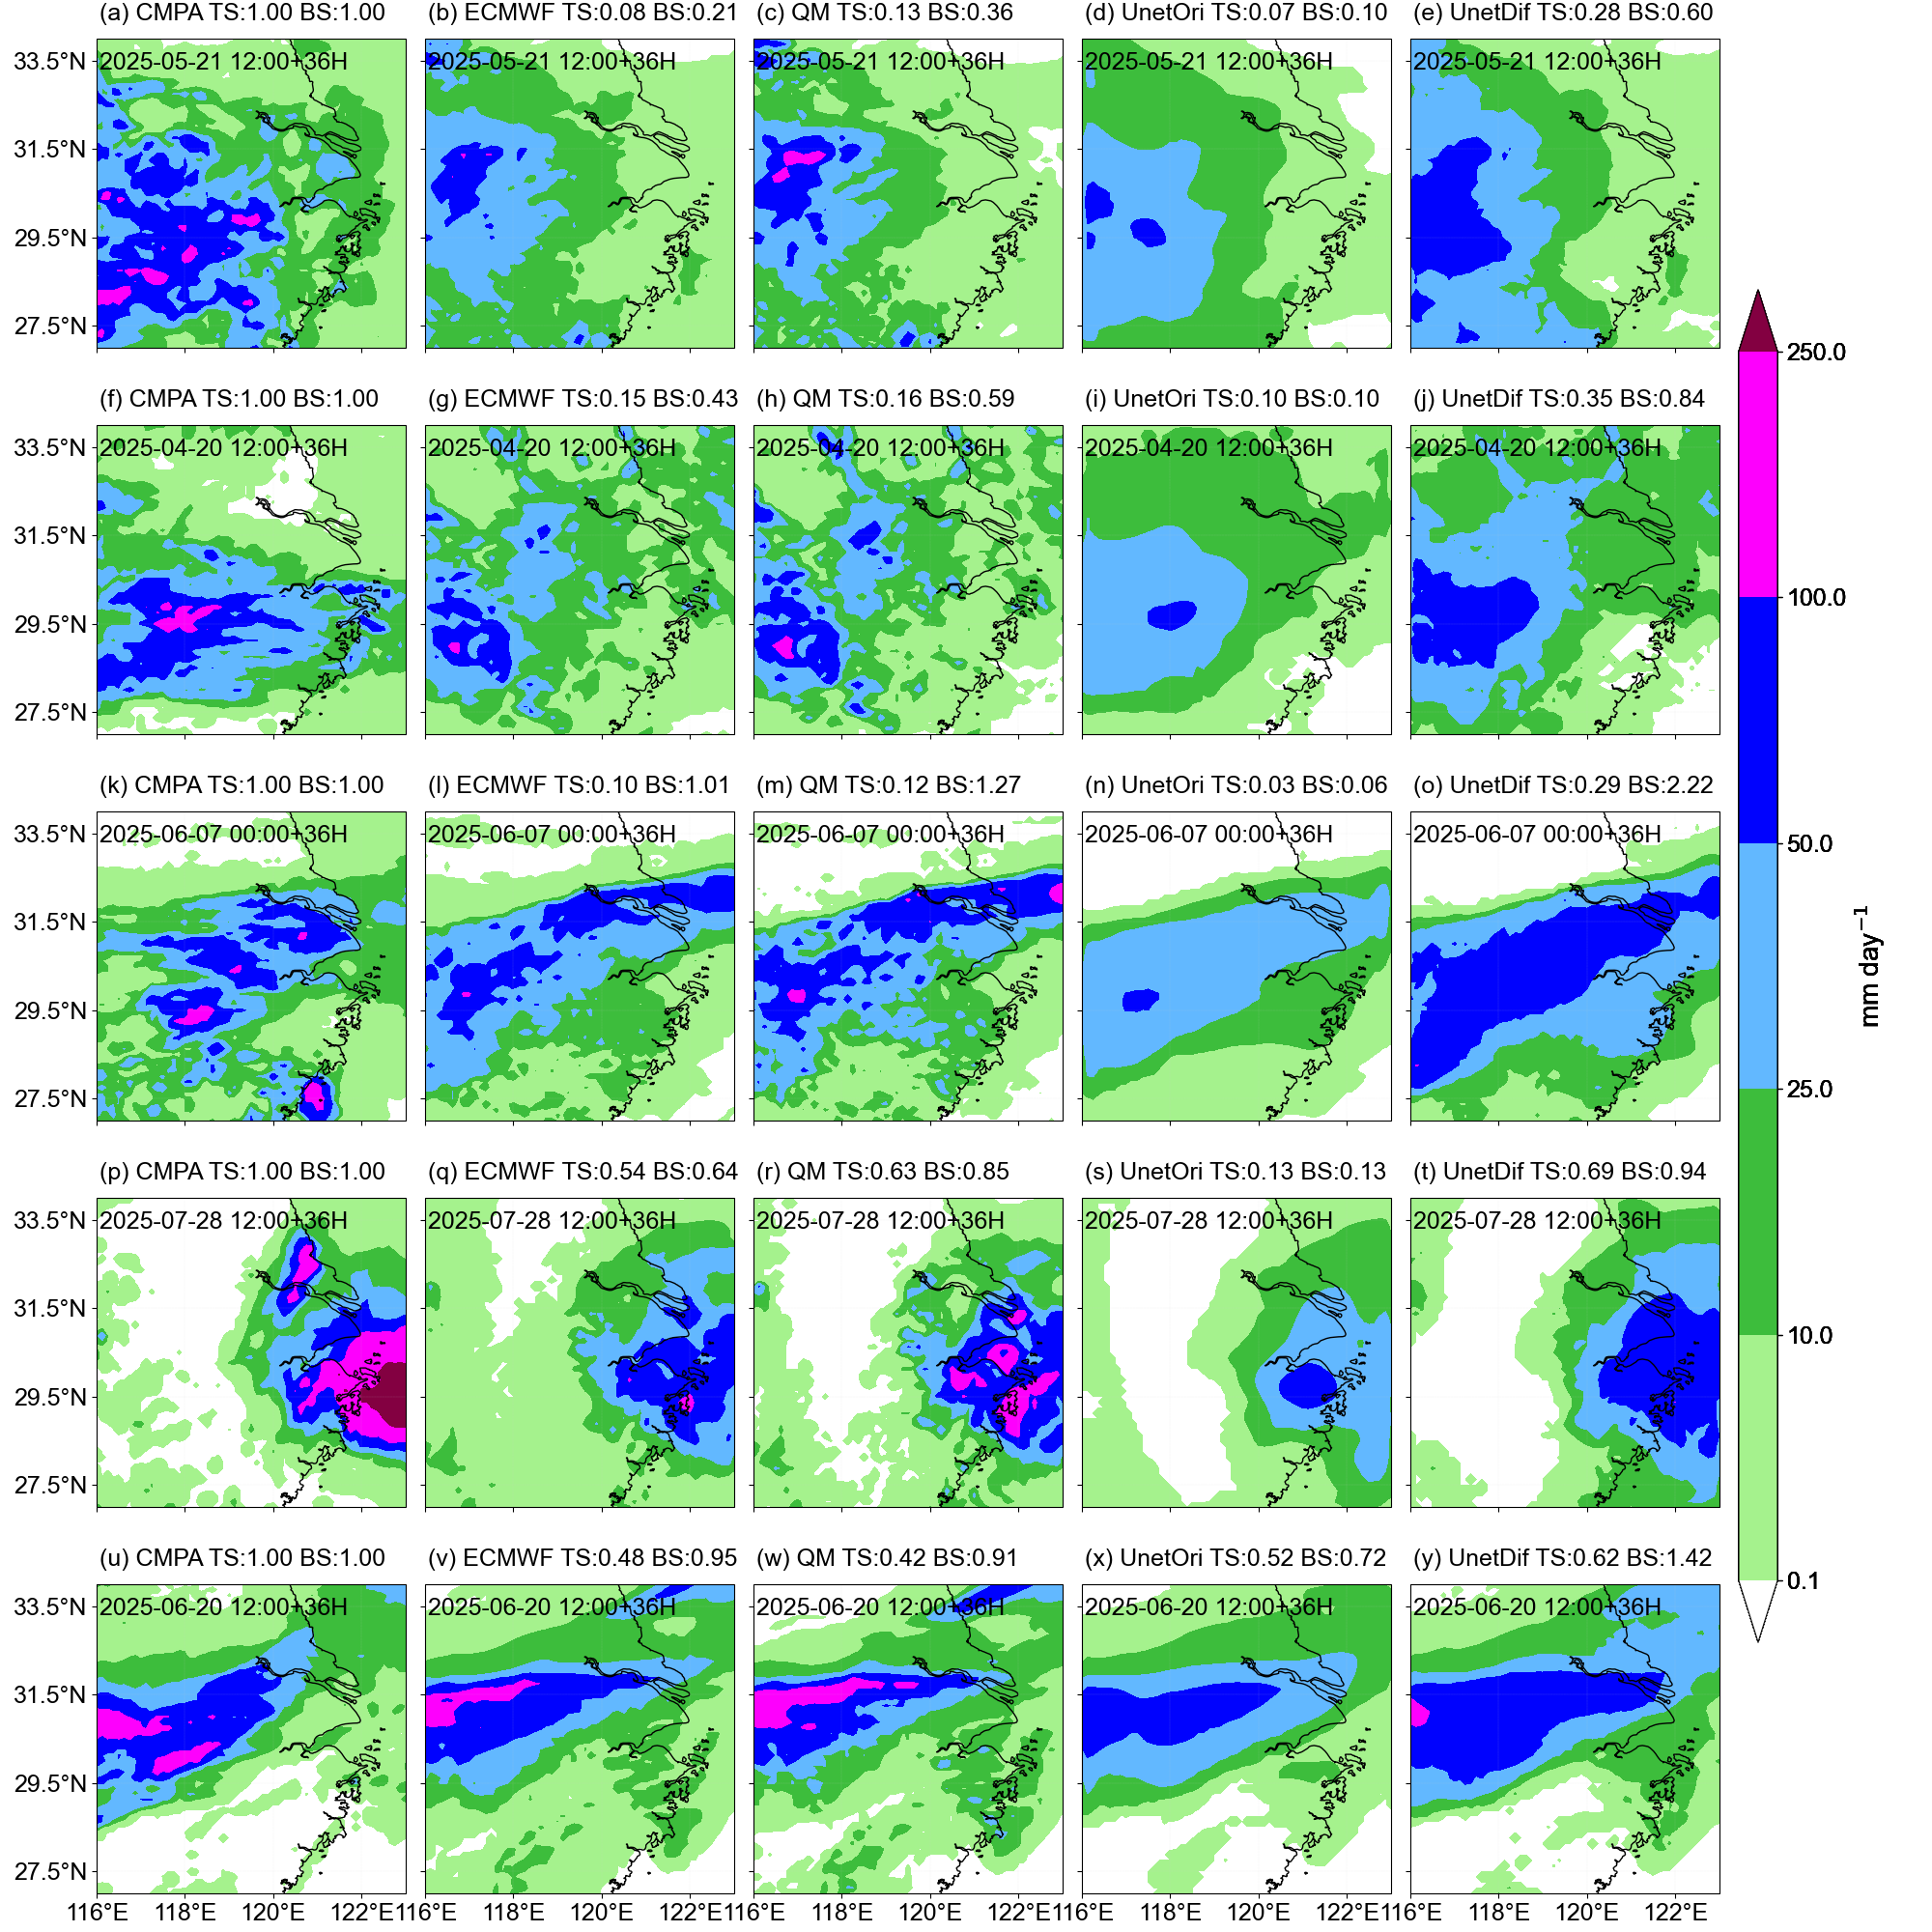


**Supplementary Figure 3.** **Five heavy rainfall events over the YRD region with the largest TS improvement by UnetDif compared to ECMWF.** Spatial distributions of 24-hour rainfall for forecasts initialized at 12 UTC on 21 May 2025 with a 36-hour lead time: (a) CMPA observations, (b) ECMWF raw forecasts, (c) quantile mapping, (d) UnetOri, and (e) UnetDif.
**(f)-(j), (k)-(o), (p)-(t), (u)-(y),** Same as **(a)-(e)**, but for forecasts initialized at 12 UTC on 20 April 2025, 00 UTC on 7 June 2025, 12 UTC on 28 July 2025, and 12 UTC on 20 June 2025, respectively.


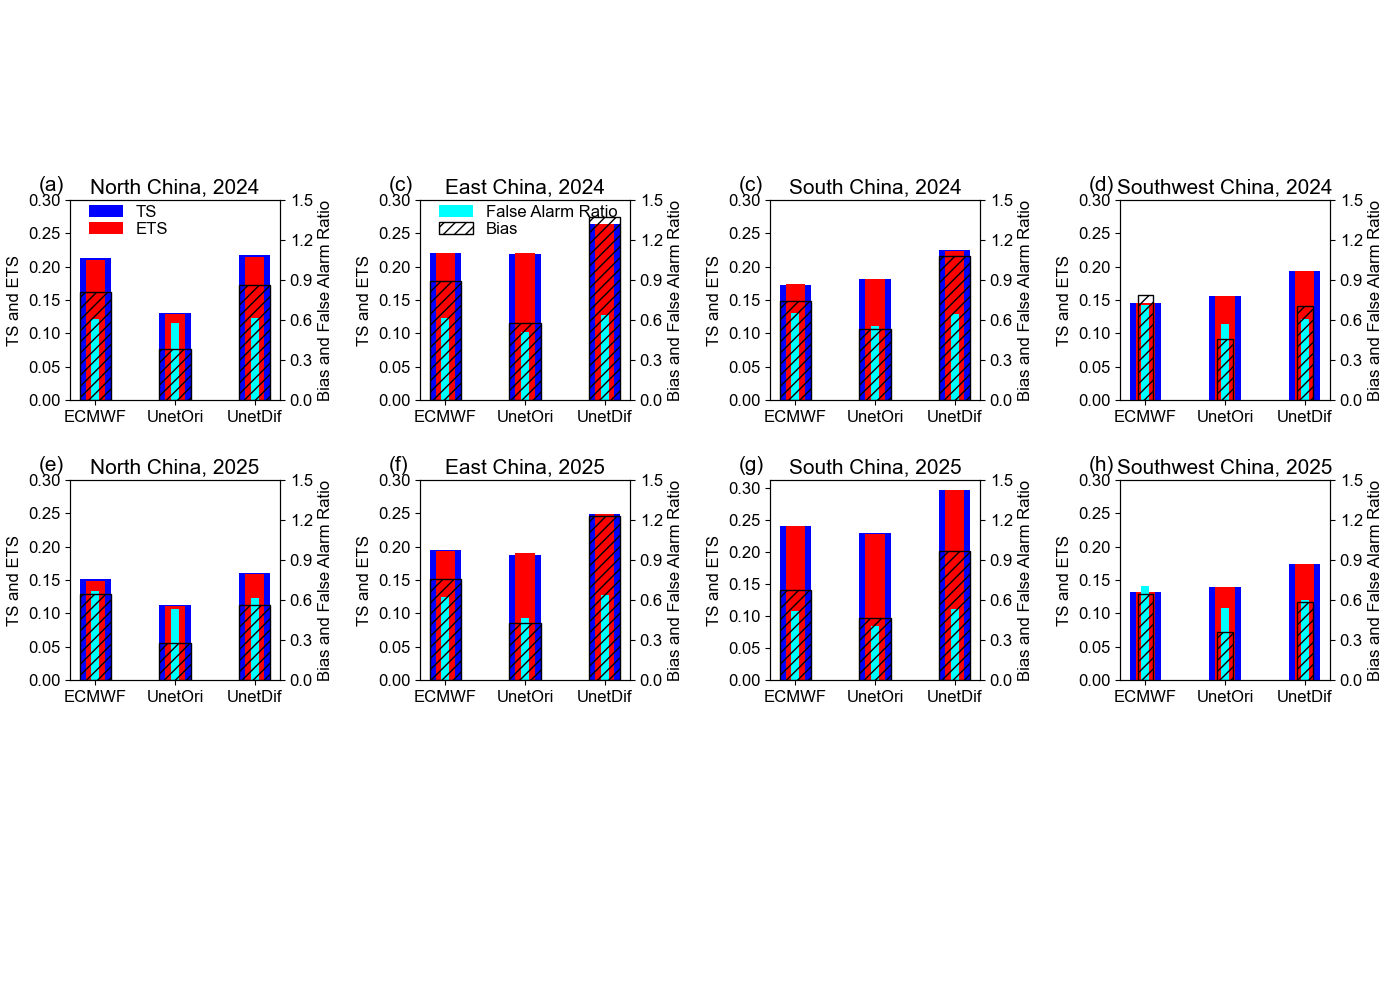


**Supplementary Figure 4. Prediction skill of heavy rainfall over four regions of China at a 36-hour lead time.** (a)-(d) Same as (b)-(e) in Figure 4, but for the evaluation of hindcast results from 1 January 2024 to 31 December 2024. (e)-(f) Same as (a)-(d), but for the hindcast results from 1 January 2025 to 31 October 2025.


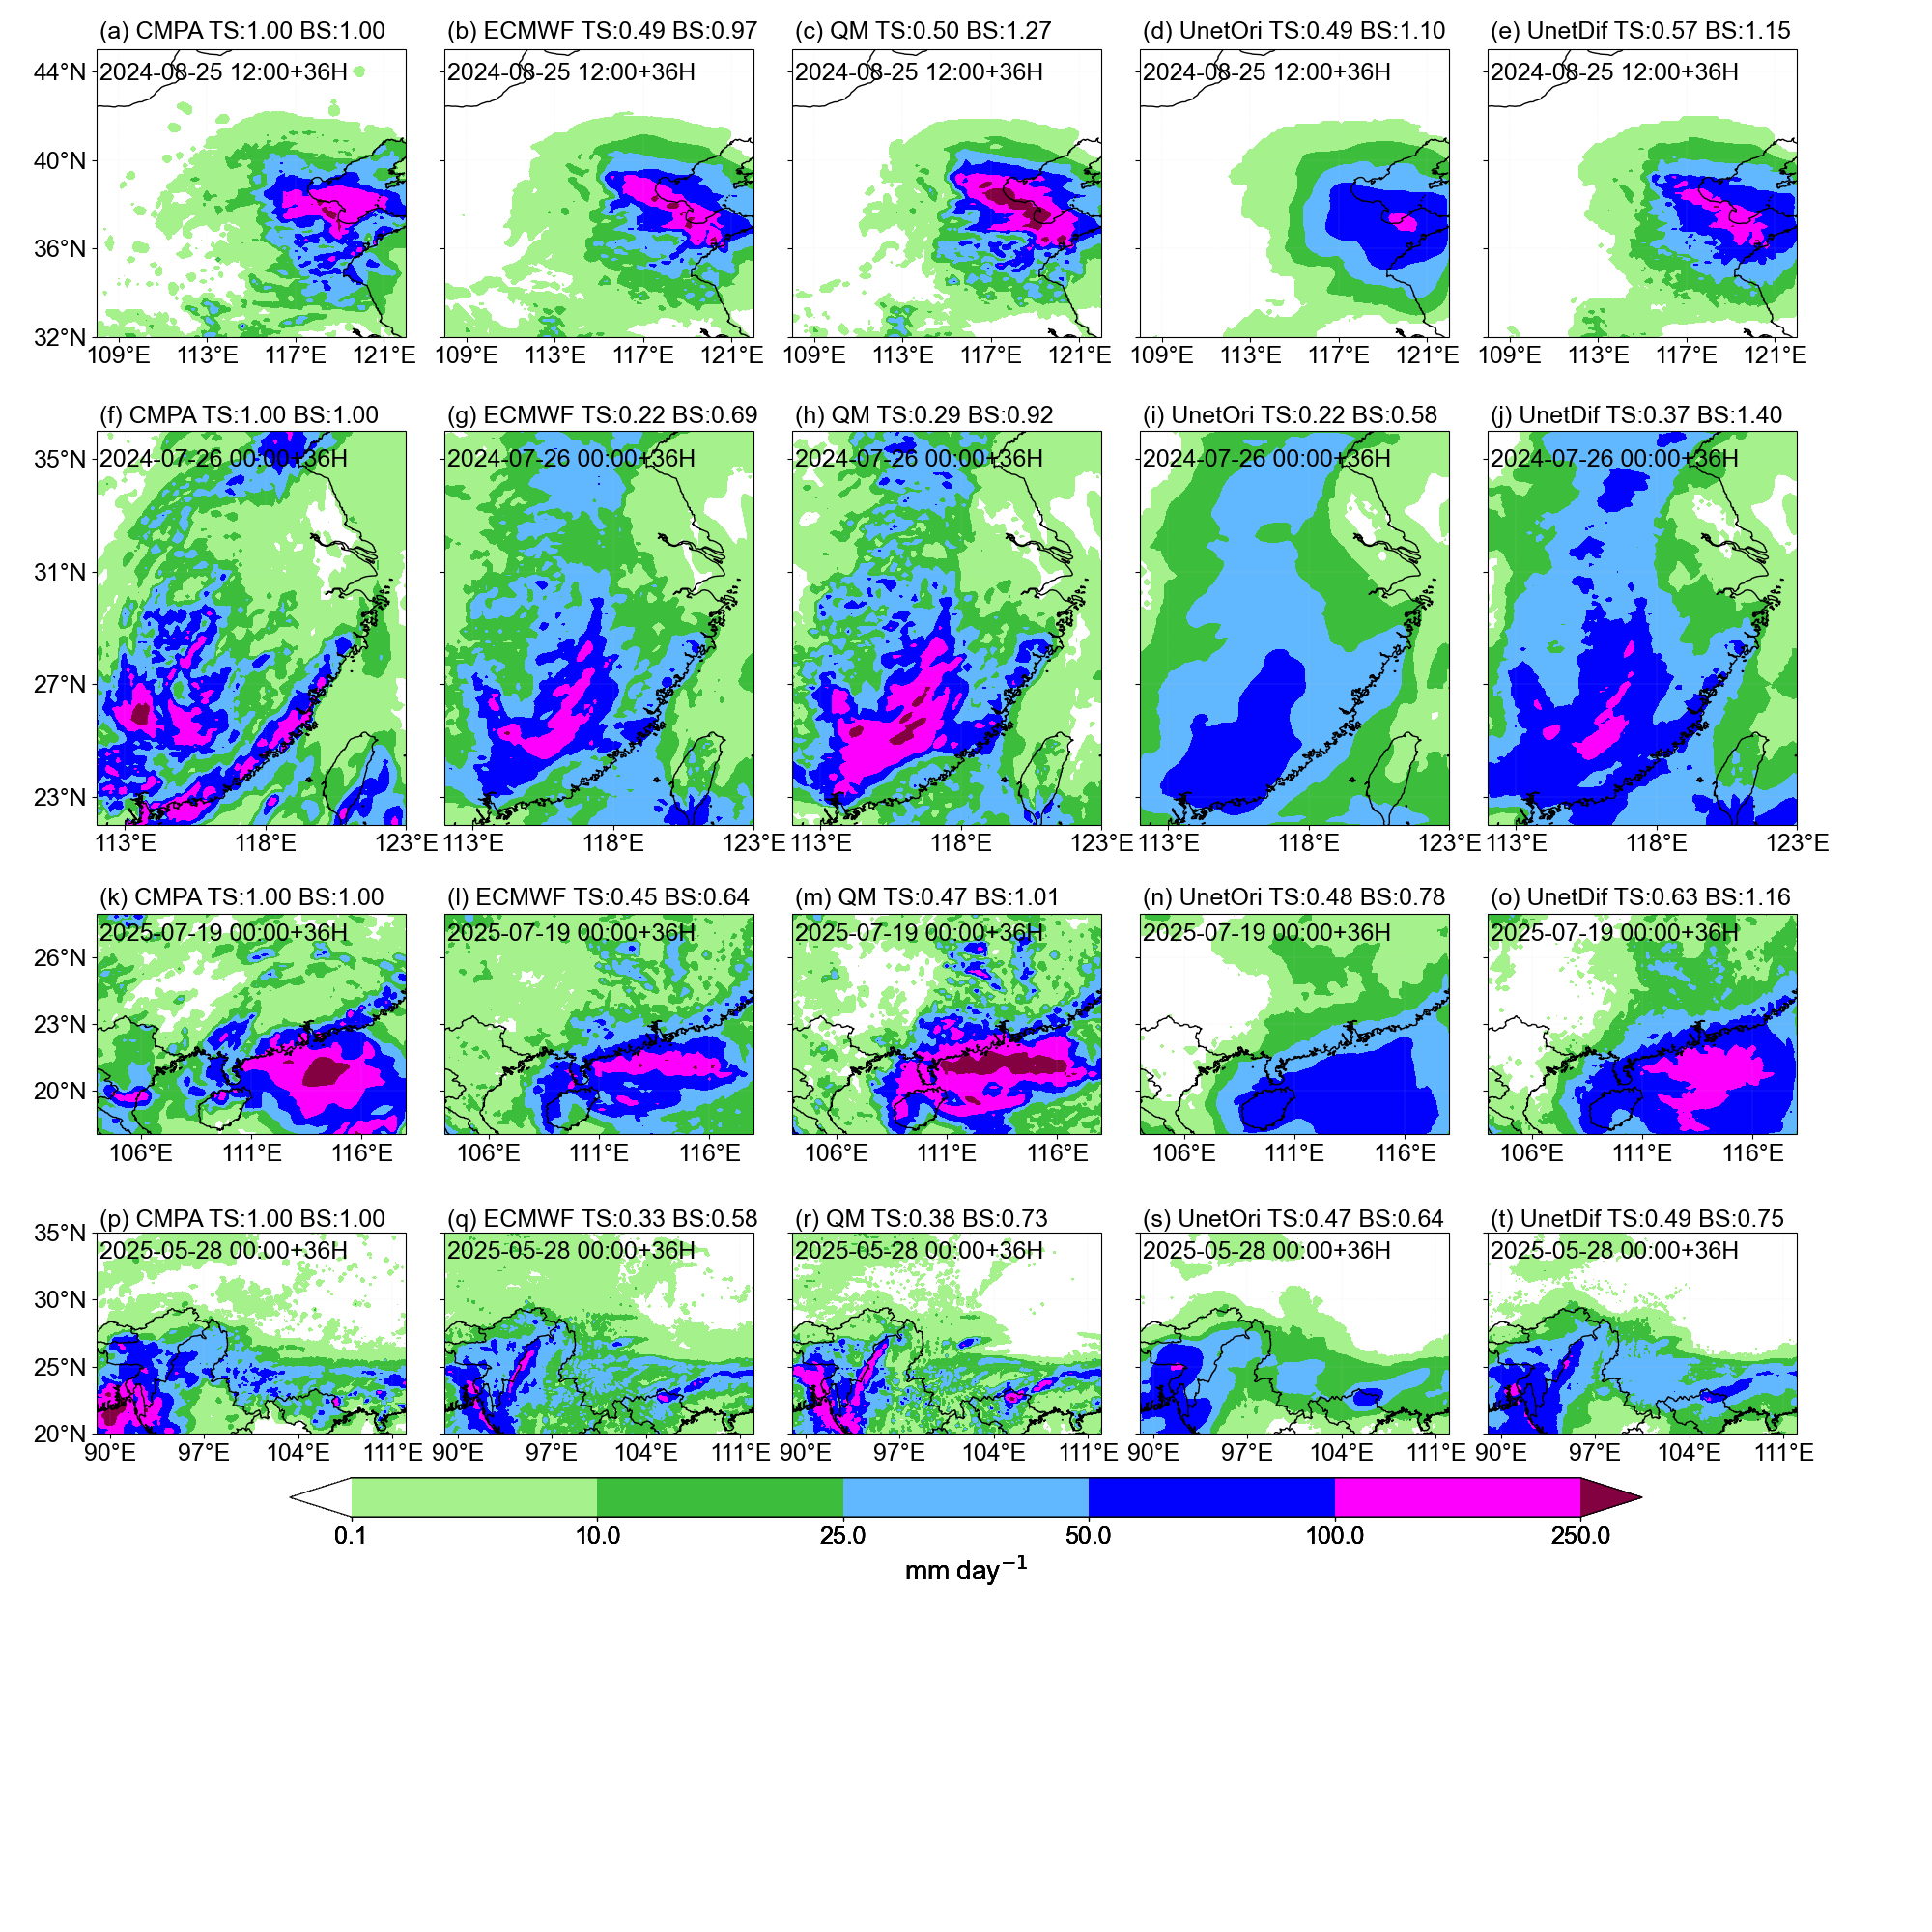


**Supplementary Figure 5. Heavy rainfall event in each region with the largest UnetDif improvement relative to ECMWF forecasts.** (a)-(e) Same as (a)-(e) in Supplementary Figure 3, but for the precipitation forecasts initialized at 12 UTC on 25 August 2024 over North China. (f)-(j), (k)-(o), (p)-(t) Same as (a)-(e), but for the precipitation forecasts initialized at 00 UTC on 26 July 2024 over East China, 00 UTC on 19 July 2025 over South China, 00 UTC on 28 May 2025 over Southwest China, respectively.

**Supplementary Table 1. Five regions examined in this study and their corresponding training, validation and testing periods.**

| Region | Initial time (HH) | Lead time  (3-hourly) | Sampling  period | Sample size | Testing  period |
| --- | --- | --- | --- | --- | --- |
| Yangtze River Delta | 00 | 15-36 | 1 Jan 2019-31 Dec 2024 | 8*575 | 1 Jan-31 Oct 2025 |
| Yangtze River Delta | 00 | 27-48 | 1 Jan 2019-31 Dec 2024 | 8*503 | 1 Jan-31 Oct 2025 |
| Yangtze River Delta | 00 | 39-60 | 1 Jan 2019-31 Dec 2024 | 8*542 | 1 Jan-31 Oct 2025 |
| Yangtze River Delta | 12 | 15-36 | 1 Jan 2019-31 Dec 2024 | 8*503 | 1 Jan-31 Oct 2025 |
| Yangtze River Delta | 12 | 27-48 | 1 Jan 2019-31 Dec 2024 | 8*549 | 1 Jan-31 Oct 2025 |
| Yangtze River Delta | 12 | 39-60 | 1 Jan 2019-31 Dec 2024 | 8*500 | 1 Jan-31 Oct 2025 |
| North China | 00 | 15-36 | 1 Jan 2019-31 Dec 2023 | 8×232 | 1 Jan 2024-31 Oct 2025 |
| East China | 00 | 15-36 | 1 Jan 2019-31 Dec 2023 | 8×644 | 1 Jan 2024-31 Oct 2025 |
| South China | 00 | 15-36 | 1 Jan 2019-31 Dec 2023 | 8×637 | 1 Jan 2024-31 Oct 2025 |
| Southwest China | 00 | 15-36 | 1 Jan 2019-31 Dec 2023 | 8×709 | 1 Jan 2024-31 Oct 2025 |
| North China | 12 | 15-36 | 1 Jan 2019-31 Dec 2023 | 8×210 | 1 Jan 2024-31 Oct 2025 |
| East China | 12 | 15-36 | 1 Jan 2019-31 Dec 2023 | 8×612 | 1 Jan 2024-31 Oct 2025 |
| South China | 12 | 15-36 | 1 Jan 2019-31 Dec 2023 | 8×626 | 1 Jan 2024-31 Oct 2025 |
| Southwest China | 12 | 15-36 | 1 Jan 2019-31 Dec 2023 | 8×707 | 1 Jan 2024-31 Oct 2025 |

**Supplementary Table 2. Variables used in the study.**

| Variable name | Unit | Level | resolution |
| --- | --- | --- | --- |
| relative humidity | Percent(%) | 500, 700, 850, 925hPa | 0.25×0.25 |
| specific humidity | g kg-1 | 500, 700, 850, 925hPa | 0.25×0.25 |
| vertical velocity | Pa s-1 | 500, 700, 850, 925hPa | 0.25×0.25 |
| temperature | ℃ | 500, 700, 850, 925hPa | 0.25×0.25 |
| u-wind component | m s-1 | 500, 700, 850, 925hPa | 0.25×0.25 |
| v-wind component | m s-1 | 500, 700, 850, 925hPa | 0.25×0.25 |
| potential vorticity | K m2 kg-1 s-1 | 500, 700, 850, 925hPa | 0.25×0.25 |
| geopotential height | gpm | 500, 700, 850, 925hPa | 0.25×0.25 |
| total column water vapor | mm | Single Level | 0.125×0.125 |
| total cloud cover | Percent(%) | Single Level | 0.125×0.125 |
| low cloud cover | Percent(%) | Single Level | 0.125×0.125 |
| large-scale precipitation | mm | Single Level | 0.125×0.125 |
| convective precipitation | mm | Single Level | 0.125×0.125 |
| precipitation | mm | Single Level | 0.125×0.125 |
| topography height | m | Single Level | 0.05×0.05 |
| CMPA | mm | Single Level | 0.05×0.05 |

**Supplementary Table 3. Evaluation scores of different methods at various lead times and thresholds over Yangtze River Delta.**

| Lead Time | Model | ACC | Bias | TS  10 | Bias  10 | ETS  10 | TS  25 | Bias  25 | ETS  25 | TS  50 | Bias  50 | ETS  50 | FAR  50 |
| --- | --- | --- | --- | --- | --- | --- | --- | --- | --- | --- | --- | --- | --- |
| 36h | ECMWF | 0.774 | 1.213 | 0.427 | 1.078 | 0.426 | 0.314 | 0.883 | 0.310 | 0.194 | 0.702 | 0.189 | 0.606 |
|  | QM | 0.809 | 0.932 | 0.399 | 0.939 | 0.398 | 0.292 | 0.917 | 0.288 | 0.195 | 0.993 | 0.189 | 0.672 |
|  | UnetOri | 0.820 | 0.772 | 0.454 | 1.039 | 0.453 | 0.339 | 0.730 | 0.338 | 0.131 | 0.258 | 0.128 | 0.437 |
|  | UnetDif | 0.817 | 0.809 | 0.445 | 1.463 | 0.445 | 0.333 | 1.497 | 0.331 | 0.237 | 1.23 | 0.230 | 0.653 |
| 48h | ECMWF | 0.766 | 1.204 | 0.406 | 1.106 | 0.407 | 0.295 | 0.951 | 0.290 | 0.176 | 0.774 | 0.170 | 0.657 |
|  | QM | 0.801 | 0.929 | 0.381 | 0.970 | 0.379 | 0.280 | 0.998 | 0.274 | 0.178 | 1.095 | 0.171 | 0.711 |
|  | UnetOri | 0.803 | 0.753 | 0.424 | 1.085 | 0.426 | 0.315 | 0.849 | 0.312 | 0.151 | 0.467 | 0.147 | 0.588 |
|  | UnetDif | 0.809 | 0.827 | 0.423 | 1.461 | 0.422 | 0.314 | 1.427 | 0.313 | 0.213 | 1.191 | 0.206 | 0.677 |
| 60h | ECMWF | 0.760 | 1.206 | 0.381 | 1.113 | 0.382 | 0.277 | 0.962 | 0.272 | 0.151 | 0.805 | 0.145 | 0.701 |
|  | QM | 0.794 | 0.929 | 0.362 | 1.001 | 0.363 | 0.266 | 1.041 | 0.273 | 0.164 | 1.149 | 0.157 | 0.736 |
|  | UnetOri | 0.801 | 0.739 | 0.396 | 1.062 | 0.395 | 0.293 | 0.828 | 0.290 | 0.116 | 0.343 | 0.113 | 0.591 |
|  | UnetDif | 0.803 | 0.782 | 0.401 | 1.477 | 0.400 | 0.298 | 1.548 | 0.295 | 0.196 | 1.327 | 0.189 | 0.711 |

**Supplementary Table 4. TS of the top 20 heavy rainfall events ranked by number of heavy rainfall grid points at a 36-hour lead time over YRD.**

| Initial time (YYYY-MM-DD HH) | Number of heavy rainfall grid points (CMPA) | ECMWF | QM | UnetOri | UnetDif | UnetDif-ECMWF |
| --- | --- | --- | --- | --- | --- | --- |
| 2025-05-30 12 | 752 | 0.334 | 0.305 | 0.301 | 0.406 | 0.072 |
| 2025-07-29 00 | 704 | 0.336 | 0.405 | 0.143 | 0.388 | 0.052 |
| 2025-06-19 00 | 649 | 0.647 | 0.639 | 0.653 | 0.622 | -0.025 |
| 2025-04-11 00 | 586 | 0.183 | 0.201 | 0 | 0.134 | -0.049 |
| 2025-05-21 12 | 564 | 0.079 | 0.132 | 0.074 | 0.284 | 0.205 |
| 2025-05-31 00 | 552 | 0.504 | 0.485 | 0.313 | 0.452 | -0.052 |
| 2025-06-14 12 | 534 | 0.327 | 0.392 | 0.048 | 0.346 | 0.019 |
| 2025-05-07 12 | 509 | 0.136 | 0.144 | 0.193 | 0.208 | 0.072 |
| 2025-06-19 12 | 501 | 0.610 | 0.608 | 0.048 | 0.738 | 0.128 |
| 2025-06-14 00 | 464 | 0.289 | 0.320 | 0.184 | 0.402 | 0.113 |
| 2025-07-28 12 | 458 | 0.537 | 0.627 | 0.133 | 0.685 | 0.148 |
| 2025-06-20 12 | 394 | 0.483 | 0.417 | 0.523 | 0.616 | 0.133 |
| 2025-07-29 12 | 390 | 0.498 | 0.406 | 0.499 | 0.408 | -0.09 |
| 2025-05-22 00 | 385 | 0.125 | 0.153 | 0.033 | 0.196 | 0.071 |
| 2026-06-06 12 | 353 | 0.355 | 0.346 | 0.078 | 0.408 | 0.053 |
| 2025-04-20 12 | 345 | 0.154 | 0.158 | 0.095 | 0.352 | 0.198 |
| 2025-06-07 00 | 341 | 0.098 | 0.123 | 0.025 | 0.290 | 0.192 |
| 2025-05-27 12 | 338 | 0.196 | 0.253 | 0.012 | 0.251 | 0.055 |
| 2025-04-10 12 | 334 | 0.176 | 0.189 | 0.006 | 0.177 | 0.001 |
| 2025-06-20 00 | 325 | 0.316 | 0.331 | 0.125 | 0.257 | -0.059 |

**Supplementary Table 5. TS of the top 5 heavy rainfall events ranked by number of heavy rainfall grid points at a 36-hour lead time over four regions of China.**

| Region | Initial time (YYYY-MM-DD HH) | | heavy rainfall grid points (CMPA) | ECMWF | QM | UnetOri | UnetDif | UnetDif-ECMWF |
| --- | --- | --- | --- | --- | --- | --- | --- | --- |
| North China | | 2024-08-25 00 | 1311 | 0.598 | 0.571 | 0.599 | 0.602 | 0.004 |
|  | | 2025-06-18 12 | 1032 | 0.207 | 0.216 | 0.216 | 0.280 | 0.073 |
|  | | 2024-07-04 12 | 1029 | 0.421 | 0.453 | 0.443 | 0.486 | 0.065 |
|  | | 2025-08-26 12 | 1023 | 0.202 | 0.280 | 0.280 | 0.149 | -0.053 |
|  | | 2024-08-25 12 | 932 | 0.488 | 0.496 | 0.494 | 0.572 | 0.084 |
| East China | | 2024-07-25 00 | 1931 | 0.493 | 0.490 | 0.527 | 0.553 | 0.060 |
|  | | 2024-10-30 12 | 1780 | 0.553 | 0.483 | 0.525 | 0.585 | 0.032 |
|  | | 2024-07-26 00 | 1709 | 0.225 | 0.285 | 0.216 | 0.370 | 0.145 |
|  | | 2024-07-25 12 | 1685 | 0.364 | 0.412 | 0.408 | 0.477 | 0.113 |
|  | | 2024-07-24 12 | 1559 | 0.543 | 0.546 | 0.583 | 0.572 | 0.029 |
| South China | | 2025-07-19 12 | 2270 | 0.407 | 0.511 | 0.392 | 0.509 | 0.102 |
|  | | 2025-07-19 00 | 2178 | 0.447 | 0.468 | 0.475 | 0.633 | 0.186 |
|  | | 2025-07-20 12 | 1786 | 0.586 | 0.571 | 0.544 | 0.617 | 0.046 |
|  | | 2025-07-20 00 | 1784 | 0.521 | 0.580 | 0.568 | 0.482 | -0.039 |
|  | | 2024-09-06 00 | 1759 | 0.627 | 0.625 | 0.633 | 0.590 | -0.037 |
| Southwest China | | 2024-06-30 00 | 2854 | 0.349 | 0.334 | 0.289 | 0.312 | -0.037 |
|  | | 2024-06-30 12 | 2831 | 0.336 | 0.360 | 0.234 | 0.356 | 0.02 |
|  | | 2025-05-29 00 | 2722 | 0.469 | 0.508 | 0.333 | 0.543 | 0.074 |
|  | | 2025-05-28 00 | 2520 | 0.327 | 0.377 | 0.470 | 0.488 | 0.161 |
|  | | 2025-05-28 12 | 2481 | 0.521 | 0.533 | 0.459 | 0.619 | 0.098 |
